# Supplementary material for: Reactions of cationic iron clusters with ammonia, models of nitrogen hydrogenation and dehydrogenation
Source: Royal Society of Chemistry journal article supplement (doi:10.1039/b316600g), 2004-01-01
Supplement: table_s1.pdf [file table_s1.pdf]

## SUPPLEMENTARY INFORMATION

*Table S1. Caresian co-ordinates (Å).*

### 1 Fe<sub>4</sub><sup>+</sup>

|    |   |           |           |           |
|----|---|-----------|-----------|-----------|
| 4  |   |           |           |           |
| Fe | 1 | -0.051490 | -1.192099 | 0.019741  |
| Fe | 2 | -2.293985 | 0.025066  | -0.019697 |
| Fe | 3 | 2.294624  | -0.028178 | -0.019683 |
| Fe | 4 | 0.050851  | 1.195212  | 0.019639  |

### 2 NH<sub>3</sub>

|   |   |           |           |           |
|---|---|-----------|-----------|-----------|
| 4 |   |           |           |           |
| N | 1 | -0.020960 | -0.017726 | -0.043489 |
| H | 2 | 0.956412  | -0.111342 | -0.274330 |
| H | 3 | -0.405067 | -0.679644 | 0.613499  |
| H | 4 | -0.404623 | 0.915066  | -0.034748 |

### 3 Fe<sub>4</sub>(NH<sub>3</sub>)<sup>+</sup>

|    |   |           |           |           |
|----|---|-----------|-----------|-----------|
| 8  |   |           |           |           |
| Fe | 1 | 0.028221  | 0.929482  | -0.029805 |
| Fe | 2 | -2.276118 | -0.255144 | -0.025425 |
| Fe | 3 | 2.252348  | -0.374999 | -0.025716 |
| Fe | 4 | -0.054636 | -1.506532 | 0.051750  |
| N  | 5 | 0.125167  | 3.033318  | 0.070364  |
| H  | 6 | 0.968313  | 3.367918  | -0.407851 |
| H  | 7 | 0.159575  | 3.336209  | 1.049789  |
| H  | 8 | -0.699243 | 3.449661  | -0.375355 |

### 4 Fe<sub>4</sub>(NH<sub>2</sub>)H<sup>+</sup>

|    |   |           |           |           |
|----|---|-----------|-----------|-----------|
| 8  |   |           |           |           |
| Fe | 1 | -0.903009 | -1.009942 | 1.673114  |
| Fe | 2 | 1.154999  | 1.444630  | -1.550997 |
| Fe | 3 | -0.207659 | -0.607261 | -1.042870 |
| Fe | 4 | 0.417054  | 0.892868  | 0.843459  |
| N  | 5 | -1.245813 | -2.004901 | -0.018821 |
| H  | 6 | -2.238759 | -2.081523 | -0.274203 |
| H  | 7 | -0.843600 | -2.950686 | -0.045954 |
| H  | 8 | -0.192970 | 0.338850  | 2.461568  |

### 5 Fe<sub>4</sub>(NH)(H<sub>2</sub>)<sup>+</sup>

|    |   |           |           |           |
|----|---|-----------|-----------|-----------|
| 8  |   |           |           |           |
| Fe | 1 | 0.021992  | -0.608414 | 1.377169  |
| Fe | 2 | 1.416656  | 1.046441  | -0.005680 |
| Fe | 3 | 0.435134  | -1.107831 | -1.055172 |
| Fe | 4 | -1.324682 | 0.841312  | -0.282688 |
| N  | 5 | -1.210056 | -1.126752 | 0.000770  |
| H  | 6 | -2.009127 | -1.769022 | -0.008032 |
| H  | 7 | -1.528871 | 2.710319  | -0.491879 |
| H  | 8 | -2.268224 | 2.486750  | -0.379824 |

**6 Fe<sub>4</sub>(NH)<sup>+</sup>**

|    |   |           |           |           |
|----|---|-----------|-----------|-----------|
| 6  |   |           |           |           |
| Fe | 1 | -0.677714 | -0.676566 | 1.280661  |
| Fe | 2 | 1.703286  | -0.040320 | 0.357935  |
| Fe | 3 | -0.100020 | -0.660982 | -1.452188 |
| Fe | 4 | -0.387273 | 1.396231  | -0.072500 |
| N  | 5 | -1.624101 | -0.053999 | -0.343666 |
| H  | 6 | -2.626562 | -0.099453 | -0.555946 |

**7 H<sub>2</sub>**

|   |   |          |          |         |
|---|---|----------|----------|---------|
| 2 |   |          |          |         |
| H | 1 | 0.000000 | 0.000000 | 0.3715  |
| H | 2 | 0.000000 | 0.000000 | -0.3715 |

**8 TS 3/4**

|    |   |           |           |           |
|----|---|-----------|-----------|-----------|
| 8  |   |           |           |           |
| Fe | 1 | -0.137314 | 1.005817  | 0.034643  |
| Fe | 2 | -2.002337 | -0.725333 | -0.245927 |
| Fe | 3 | 2.246444  | 0.183849  | -0.212318 |
| Fe | 4 | 0.372497  | -1.443490 | 0.314439  |
| N  | 5 | -1.101089 | 2.605868  | 0.270018  |
| H  | 6 | -1.888647 | 1.073443  | 0.237957  |
| H  | 7 | -1.567532 | 3.126043  | -0.475909 |
| H  | 8 | -1.297725 | 3.017545  | 1.186078  |

**9 TS 4/5**

|    |   |           |           |           |
|----|---|-----------|-----------|-----------|
| 8  |   |           |           |           |
| Fe | 1 | -0.403742 | -0.450084 | 1.353684  |
| Fe | 2 | 1.789005  | -0.191568 | -0.020719 |
| Fe | 3 | -0.508649 | -0.956921 | -1.093542 |
| Fe | 4 | -0.131433 | 1.519187  | -0.235575 |
| N  | 5 | -1.841042 | -0.121415 | 0.109976  |
| H  | 6 | -2.828164 | -0.385960 | 0.230128  |
| H  | 7 | -1.937605 | 1.170792  | -0.375518 |
| H  | 8 | -1.721615 | 2.129106  | -0.724482 |

**10 Fe<sub>4</sub>(H<sub>2</sub>)<sup>+</sup>**

|    |   |           |           |           |
|----|---|-----------|-----------|-----------|
| 6  |   |           |           |           |
| Fe | 1 | 0.768716  | -0.983248 | -0.056573 |
| Fe | 2 | 1.529052  | 1.242637  | -1.146284 |
| Fe | 3 | -1.420284 | -1.360419 | 1.179505  |
| Fe | 4 | -0.739781 | 0.898530  | 0.014502  |
| H  | 5 | -1.562146 | 2.745834  | 0.399238  |
| H  | 6 | -2.018113 | 2.519178  | -0.169137 |

**11** *endo*-Fe<sub>4</sub>N<sup>+</sup>

|    |   |           |           |           |
|----|---|-----------|-----------|-----------|
| 5  |   |           |           |           |
| Fe | 1 | -0.621312 | 1.668855  | -0.626605 |
| Fe | 2 | -0.136376 | -0.081703 | 1.882875  |
| Fe | 3 | -1.022050 | -1.373784 | -0.766917 |
| Fe | 4 | 1.783557  | -0.215811 | -0.491982 |
| N  | 5 | -0.014186 | 0.009072  | 0.009767  |

**12** Fe<sub>4</sub>N(H<sub>2</sub>)<sup>+</sup>

|    |   |           |           |           |
|----|---|-----------|-----------|-----------|
| 7  |   |           |           |           |
| Fe | 1 | -0.114870 | 1.837138  | 0.392356  |
| Fe | 2 | -0.028974 | -1.017876 | 1.564629  |
| Fe | 3 | -1.436134 | -0.643183 | -1.058412 |
| Fe | 4 | 1.580905  | -0.450074 | -0.916257 |
| N  | 5 | -0.008179 | -0.020273 | -0.019807 |
| H  | 6 | -0.144951 | 3.672056  | 0.656446  |
| H  | 7 | 0.178106  | 3.593748  | -0.057995 |

**13** TS 12/14

|    |   |          |          |         |
|----|---|----------|----------|---------|
| 7  |   |          |          |         |
| Fe | 1 | -0.69961 | -1.74813 | 0.97922 |
| Fe | 2 | 1.40751  | -0.12561 | 0.18754 |
| Fe | 3 | -0.40438 | -0.20355 | -1.7596 |
| Fe | 4 | -0.01513 | 1.9824   | 0.51466 |
| N  | 5 | -0.60965 | -0.04221 | 0.15003 |
| H  | 6 | -1.49207 | 0.85322  | 0.60097 |
| H  | 7 | -1.77775 | 1.84779  | 0.90514 |

**14** Fe<sub>4</sub>(NH)H<sup>+</sup>

|    |   |           |           |           |
|----|---|-----------|-----------|-----------|
| 7  |   |           |           |           |
| Fe | 1 | 0.206180  | 1.346445  | -0.780775 |
| Fe | 2 | 1.534341  | -0.761909 | -0.126732 |
| Fe | 3 | -0.168754 | 0.265915  | 1.372397  |
| Fe | 4 | -1.138979 | -1.123149 | -0.499202 |
| N  | 5 | -1.472757 | 0.727654  | 0.033438  |
| H  | 6 | 1.476169  | 0.876721  | 0.620306  |
| H  | 7 | -2.419347 | 1.119845  | 0.037747  |

**15** TS 14/16

|    |   |           |           |           |
|----|---|-----------|-----------|-----------|
| 7  |   |           |           |           |
| Fe | 1 | 0.676908  | 1.128755  | 0.676245  |
| Fe | 2 | -1.289081 | 0.624402  | -0.940793 |
| Fe | 3 | 0.841593  | -0.907831 | -0.761031 |
| Fe | 4 | -1.000211 | -0.827056 | 1.026196  |
| N  | 5 | 2.135805  | 0.130689  | -0.042643 |
| H  | 6 | 1.931890  | -1.511977 | 0.284397  |
| H  | 7 | 3.158049  | 0.122111  | -0.001932 |

**16 Fe<sub>4</sub>(NH<sub>2</sub>)<sup>+</sup>**

7

|    |   |           |           |           |
|----|---|-----------|-----------|-----------|
| Fe | 1 | -0.058725 | -0.777528 | -1.179853 |
| Fe | 2 | -1.228548 | 1.197374  | -0.006089 |
| Fe | 3 | 0.058326  | -0.746614 | 1.199862  |
| Fe | 4 | 1.228360  | 1.197635  | -0.025341 |
| N  | 5 | 0.001457  | -2.382292 | 0.031284  |
| H  | 6 | 0.828741  | -2.982924 | -0.054039 |
| H  | 7 | -0.823697 | -2.983589 | 0.132004  |
